# Supplementary material for: Multiobjective Optimization Design of Spinal Pedicle Screws Using Neural Networks and Genetic Algorithm: Mathematical Models and Mechanical Validation
Source: Comput Math Methods Med. 2013 Jul 31;2013:462875. doi: 10.1155/2013/462875 (PMC3747468; doi:10.1155/2013/462875)
Supplement: Supplementary file 1 — Multiobjective optimization process using genetic algorism. [file 462875.f1.xls]

## Sheet: Running GA
	No. of generations	300
	No. of populations	40
	Crossover rate	0.9
	Mutation rate	0.1							Progress	100	%
	weight	Fitness Value	Screw's Parameters						Pareto Front ( Non-Dominant solutions )
									Total Reaction Force	Maximum Bending Stress		Total Reaction Force	Maximum Bending Stress
			BP	ID	PRR	P	PHA	Tw	(N.)	(Mpa.)		Normalized Value ( 0-1)
	0	0.999127	1.13	3.8	0.4	2.6	5	0.1	39.9895	468.396		0.999127	0.847853
	0.01	0.997629	0.56	3.8	0.4	2.6	5	0.1	39.9893	466.521		0.999112	0.850844
	0.02	0.996147	0.56	3.8	0.4	2.6	5	0.1	39.9893	466.521		0.999112	0.850844
	0.03	0.994677	0.28	3.8	0.4	2.6	5	0.1	39.989	465.61		0.999081	0.852297
	0.04	0.993222	0	3.8	0.4	2.6	5	0.1	39.9884	464.706		0.999034	0.853739
	0.05	0.991769	0	3.8	0.4	2.6	5	0.1	39.9884	464.706		0.999034	0.853739
	0.06	0.990316	0	3.8	0.4	2.6	5	0.1	39.9884	464.706		0.999034	0.853739
	0.07	0.988863	0	3.8	0.4	2.6	5	0.1	39.9884	464.706		0.999034	0.853739
	0.08	0.98741	0	3.8	0.4	2.6	5	0.1	39.9884	464.706		0.999034	0.853739
	0.09	0.985957	0	3.8	0.4	2.6	5	0.1	39.9884	464.706		0.999034	0.853739
	0.1	0.984504	0	3.8	0.4	2.6	5	0.1	39.9884	464.706		0.999034	0.853739
	0.11	0.983051	0	3.8	0.4	2.6	5	0.1	39.9884	464.706		0.999034	0.853739
	0.12	0.981598	0	3.8	0.4	2.6	5	0.1	39.9884	464.706		0.999034	0.853739
	0.13	0.980145	0	3.8	0.4	2.6	5	0.1	39.9884	464.706		0.999034	0.853739
	0.14	0.978692	0	3.8	0.4	2.6	5	0.1	39.9884	464.706		0.999034	0.853739
	0.15	0.977239	0	3.8	0.4	2.6	5	0.1	39.9884	464.706		0.999034	0.853739
	0.16	0.975787	0	3.8	0.4	2.6	5	0.1	39.9884	464.706		0.999034	0.853739
	0.17	0.974334	0	3.8	0.4	2.6	5	0.1	39.9884	464.706		0.999034	0.853739
	0.18	0.972881	0	3.8	0.4	2.6	5	0.1	39.9884	464.706		0.999034	0.853739
	0.19	0.971475	0	3.8	0.4	2.63	5	0.1	39.9686	460.147		0.997387	0.861009
	0.2	0.970142	0	3.8	0.4	2.65	5	0.1	39.9553	457.256		0.996273	0.865621
	0.21	0.968877	0	3.8	0.4	2.68	5	0.1	39.9349	453.133		0.994577	0.872196
	0.22	0.96767	0	3.8	0.4	2.69	5	0.1	39.9281	451.814		0.994006	0.874299
	0.23	0.966522	0	3.8	0.4	2.73	5	0.1	39.9002	446.812		0.991686	0.882278
	0.24	0.965428	0	3.8	0.4	2.75	5	0.1	39.8861	444.468		0.990505	0.886016
	0.25	0.964382	0	3.8	0.4	2.77	5	0.1	39.8717	442.226		0.989311	0.889592
	0.26	0.963384	0	3.8	0.4	2.77	5	0.1	39.8717	442.226		0.989311	0.889592
	0.27	0.962387	0	3.8	0.4	2.77	5	0.1	39.8717	442.226		0.989311	0.889592
	0.28	0.961511	0	3.8	0.4	2.82	5	0.1	39.8352	437.046		0.986266	0.897854
	0.29	0.960633	0	3.8	0.4	2.83	5	0.1	39.8278	436.079		0.985646	0.899395
	0.3	0.959786	0	3.8	0.4	2.84	5	0.1	39.8203	435.136		0.985023	0.9009
	0.31	0.958859	0	3.8	0.4	2.86	5.11	0.1	39.8036	433.373		0.983635	0.903712
	0.32	0.958178	0	3.8	0.4	2.86	5	0.1	39.8052	433.315		0.983765	0.903804
	0.33	0.95724	0	3.8	0.4	2.95	5	0.1	39.7351	426.143		0.977925	0.915243
	0.34	0.956613	0	3.8	0.4	2.95	5	0.1	39.7351	426.143		0.977925	0.915243
	0.35	0.955986	0	3.8	0.4	2.95	5	0.1	39.7351	426.143		0.977925	0.915243
	0.36	0.955359	0	3.8	0.4	2.95	5	0.1	39.7351	426.143		0.977925	0.915243
	0.37	0.954732	0	3.8	0.4	2.95	5	0.1	39.7351	426.143		0.977925	0.915243
	0.38	0.954116	0	3.8	0.4	2.96	5	0.1	39.7271	425.442		0.977257	0.91636
	0.39	0.953507	0	3.8	0.4	2.96	5	0.1	39.7271	425.442		0.977257	0.91636
	0.4	0.952955	0	3.8	0.4	2.99	5	0.1	39.7028	423.448		0.975231	0.91954
	0.41	0.952398	0	3.8	0.4	2.99	5	0.1	39.7028	423.448		0.975231	0.91954
	0.42	0.951836	0	3.8	0.4	3.04	5	0.1	39.6613	420.463		0.971776	0.924301
	0.43	0.951284	0	3.8	0.4	2.99	5	0.1	39.7028	423.448		0.975231	0.91954
	0.44	0.950887	0	3.8	0.4	3.04	5	0.1	39.6613	420.463		0.971776	0.924301
	0.45	0.950419	0	3.8	0.4	3.05	5	0.1	39.6529	419.914		0.971073	0.925176
	0.46	0.94997	0	3.8	0.4	3.06	5	0.1	39.6444	419.381		0.970366	0.926028
	0.47	0.949463	0	3.8	0.4	3.04	5	0.1	39.6613	420.463		0.971776	0.924301
	0.48	0.948988	0	3.8	0.4	3.04	5	0.1	39.6613	420.463		0.971776	0.924301
	0.49	0.948613	0	3.8	0.4	3.14	5	0.1	39.5748	415.629		0.964564	0.932012
	0.5	0.948241	0	3.8	0.4	3.15	5	0.1	39.5658	415.22		0.96382	0.932663
	0.51	0.947989	0	3.8	0.4	3.12	5	0.1	39.5925	416.484		0.966039	0.930647
	0.52	0.947089	0	3.8	0.4	3.04	5	0.1	39.6613	420.463		0.971776	0.924301
	0.53	0.947281	0	3.8	0.4	3.12	5	0.1	39.5925	416.484		0.966039	0.930647
	0.54	0.946927	0	3.8	0.4	3.12	5	0.1	39.5925	416.484		0.966039	0.930647
	0.55	0.946573	0	3.8	0.4	3.12	5	0.1	39.5925	416.484		0.966039	0.930647
	0.56	0.945473	0	3.8	0.4	3.3	5	0.1	39.4257	410.475		0.952144	0.940231
	0.57	0.945866	0	3.8	0.4	3.12	5	0.1	39.5925	416.484		0.966039	0.930647
	0.58	0.945512	0	3.8	0.4	3.12	5	0.1	39.5925	416.484		0.966039	0.930647
	0.59	0.945225	0	3.82	0.4	3.18	5.23	0.1	39.512	413.49		0.959332	0.935422
	0.6	0.944996	0	3.8	0.4	3.3	5	0.1	39.4257	410.475		0.952144	0.940231
	0.61	0.945188	0	3.8	0.4	3.22	5	0.1	39.5019	412.701		0.958493	0.936681
	0.62	0.944901	0	3.82	0.4	3.23	5	0.1	39.4699	411.743		0.955822	0.938208
	0.63	0.944779	0	3.8	0.4	3.23	5	0.1	39.4926	412.387		0.957715	0.937182
	0.64	0.94452	0	3.8	0.4	3.3	5	0.1	39.4257	410.475		0.952144	0.940231
	0.65	0.944401	0	3.8	0.4	3.3	5	0.1	39.4257	410.475		0.952144	0.940231
	0.66	0.944281	0	3.8	0.4	3.3	5	0.1	39.4257	410.475		0.952144	0.940231
	0.67	0.944179	0	3.82	0.4	3.3	5	0.1	39.4025	409.862		0.950207	0.941209
	0.68	0.944067	0	3.85	0.4	3.32	5	0.1	39.3467	408.51		0.945558	0.943364
	0.69	0.944108	0	3.9	0.4	3.3	5	0.1	39.3044	407.459		0.94203	0.945041
	0.7	0.944138	0	3.9	0.4	3.3	5	0.1	39.3044	407.459		0.94203	0.945041
	0.71	0.944183	0	3.92	0.4	3.32	5	0.1	39.258	406.456		0.938163	0.946642
	0.72	0.944355	0	4.01	0.4	3.3	5	0.1	39.1549	404.286		0.929578	0.950102
	0.73	0.944475	0	4.01	0.4	3.3	5.11	0.1	39.153	404.322		0.929415	0.950045
	0.74	0.944806	0	4.04	0.4	3.3	5	0.1	39.111	403.446		0.925919	0.951442
	0.75	0.945006	0	4.02	0.4	3.3	5	0.1	39.1405	404.005		0.928371	0.950551
	0.76	0.945458	0	4.13	0.4	3.32	5	0.1	38.9481	400.641		0.912342	0.955916
	0.77	0.94588	0	4.12	0.4	3.3	5	0.1	38.9869	401.257		0.915571	0.954933
	0.78	0.945261	0.56	4.24	0.4	3.3	5.23	0.1	38.7846	399.09		0.898713	0.95839
	0.79	0.946768	0	4.34	0.4	3.3	5	0.1	38.5863	395.613		0.88219	0.963935
	0.8	0.947573	0	4.22	0.4	3.3	5	0.1	38.8161	398.625		0.901342	0.959131
	0.81	0.948363	0	4.37	0.4	3.3	5	0.1	38.5243	394.884		0.877022	0.965097
	0.82	0.94878	0	4.25	0.4	3.3	5.23	0.1	38.7585	397.925		0.896541	0.960247
	0.83	0.949808	0	4.29	0.4	3.3	5	0.1	38.6855	396.849		0.890458	0.961964
	0.84	0.95074	0.28	4.44	0.4	3.34	5	0.1	38.3275	393.124		0.860626	0.967904
	0.85	0.952062	0	4.65	0.4	3.3	5	0.1	37.8486	388.525		0.82072	0.975239
	0.86	0.953051	0	4.76	0.4	3.3	5	0.1	37.5317	386.235		0.794312	0.978892
	0.87	0.955141	0	4.67	0.4	3.3	5	0.1	37.7933	388.1		0.816106	0.975917
	0.88	0.956736	0	4.72	0.4	3.32	5.11	0.1	37.6208	386.874		0.801734	0.977873
	0.89	0.958274	0	4.71	0.4	3.37	5.47	0.1	37.5744	386.731		0.797866	0.9781
	0.9	0.960414	0	4.87	0.4	3.31	5.94	0.1	37.1743	384.173		0.764525	0.98218
	0.91	0.962558	0.28	4.92	0.4	3.34	5.11	0.1	36.9683	383.132		0.747362	0.983841
	0.92	0.965499	0	4.97	0.4	3.3	5	0.1	36.842	382.164		0.736829	0.985384
	0.93	0.96883	0	5.21	0.4	3.3	5.11	0.1	35.9241	377.985		0.660342	0.992049
	0.94	0.971878	0	5.47	0.4	3.31	8.77	0.1	34.8272	374.506		0.568931	0.997598
	0.95	0.976004	0	5.3	0.4	3.3	5.59	0.1	35.5551	376.614		0.629593	0.994236
	0.96	0.979833	0.28	5.4	0.4	3.41	7	0.1	34.9302	375.134		0.577517	0.996596
	0.97	0.983166	0	5.31	0.42	3.41	5.11	0.11	35.0882	375.944		0.590686	0.995304
	0.98	0.988651	0	5.43	0.44	3.41	5.23	0.12	34.3441	374.23		0.528673	0.998038
	0.99	0.993901	0	5.47	0.4	3.65	5.23	0.11	33.9681	373.679		0.497339	0.998917
	1	0.997597	0	5.46	0.81	3.68	5.59	0.19	30.332	374.507		0.194335	0.997597

## Sheet: Weight and Bias
Bending Weigh & Bias			Pullout Weigh & Bias
W11	0.635202		W11	-0.632564
W12	-0.432026		W12	-0.302742
W13	0.0541252		W13	-0.136354
W14	0.269551		W14	-0.417033
W15	0.0452957		W15	-0.246682
W16	-0.0784214		W16	0.111875
W21	0.470183		W21	0.473129
W22	-0.52576		W22	-0.132762
W23	-0.205415		W23	0.168232
W24	-1.70003		W24	0.651653
W25	0.0519053		W25	0.242149
W26	0.459065		W26	0.209538
W31	3.20755		W31	-1.1918
W32	-0.71586		W32	1.21185
W33	0.154049		W33	0.72381
W34	0.396528		W34	0.108778
W35	0.0492693		W35	-0.284525
W36	0.0199974		W36	0.235422
W41	0.703348		W41	1.28435
W42	1.46106		W42	-0.447878
W43	2.73029		W43	-1.3527
Bias1	0.892839		Bias1	-0.122112
Bias2	2.98227		Bias2	0.742836
Bias3	4.63254		Bias3	1.53725
Bias4	1.29465		Bias4	-1.14093

## Sheet: Running Dominant Solutions
No. of Dominant solutions	10000
	No.	Dominant Solutions				Commercial Screws
		Reaction Force	Bending Stress			Reaction Force	Bending Stress
	1	37.7776	426.264		Moss	34.043	1268
	2	38.4126	427.633		Viper	33.526	1766
	3	35.6996	547.59		Aspine	42.802	628.557
	4	36.6542	591.034		Synthes	40.246	1134
	5	35.0886	671.824
	6	33.6283	533.268
	7	32.0444	384.512
	8	36.2989	468.105
	9	36.5653	439.659
	10	35.5111	780.361
	11	34.5054	385.97
	12	37.4157	646.544
	13	37.834	423.661
	14	34.7277	494.76
	15	34.563	413.124
	16	37.9922	410.324
	17	34.0768	429.554
	18	35.2457	435.499
	19	36.1967	435.778
	20	31.9632	390.61
	21	39.1368	555.845
	22	34.6093	417.213
	23	37.6796	474.937
	24	37.08	551.88
	25	36.6485	496.156
	26	37.3604	483.268
	27	38.1396	562.928
	28	37.747	437.976
	29	34.8928	405.593
	30	34.5657	394.861
	31	36.679	462.316
	32	37.4449	451.178
	33	31.7051	382.826
	34	34.0738	630.971
	35	35.9875	494.982
	36	37.3699	412.857
	37	39.1412	411.604
	38	32.8125	392.867
	39	37.6266	396.712
	40	37.2053	436.378
	41	32.1188	407.217
	42	32.8195	383.168
	43	34.7411	423.602
	44	37.0455	542.501
	45	37.2026	479.265
	46	36.6926	462.982
	47	36.2523	476.126
	48	36.1226	464.58
	49	37.0042	456.882
	50	35.2995	417.314
	51	36.3229	451.526
	52	38.1214	458.174
	53	32.9212	421.469
	54	36.4232	431.919
	55	35.4407	550.76
	56	37.2572	407.28
	57	31.8851	404.19
	58	37.7585	452.632
	59	32.0708	386.555
	60	36.1061	443.786
	61	34.7111	416.862
	62	32.9944	421.255
	63	32.5954	421.516
	64	32.8792	393.575
	65	34.2423	402.641
	66	34.7797	450.562
	67	36.3684	544.053
	68	35.3916	481.121
	69	34.5607	393.508
	70	36.3589	495.638
	71	37.657	448.824
	72	36.7608	425.828
	73	34.3739	552.85
	74	38.2987	488.468
	75	32.1236	418.209
	76	35.1137	586.708
	77	37.3253	456.419
	78	37.1358	412.692
	79	36.0599	498.251
	80	32.8434	439.081
	81	37.3851	504.438
	82	35.0993	428.871
	83	34.7246	437.882
	84	36.0448	558.667
	85	35.9321	409.119
	86	35.247	411.749
	87	35.4636	471.721
	88	34.6335	425.719
	89	37.7387	636.078
	90	37.0909	429.801
	91	33.8172	456.877
	92	31.917	389.681
	93	35.5977	571.658
	94	37.8867	481.619
	95	33.1428	381.24
	96	34.5804	476.339
	97	35.301	485.629
	98	36.4352	437.388
	99	32.469	405.575
	100	35.3149	423.063
	101	38.1099	462.824
	102	35.2373	455.697
	103	37.845	721.149
	104	34.3334	566.864
	105	37.8477	465.283
	106	36.1671	486.246
	107	35.0319	396.03
	108	37.2984	523.264
	109	36.9011	426.108
	110	34.9842	453.123
	111	38.0686	482.965
	112	35.0566	416.282
	113	36.9476	413.537
	114	35.2122	544.004
	115	37.2094	492.54
	116	36.3854	738.7
	117	32.6945	388.111
	118	33.4899	416.935
	119	37.843	509.726
	120	34.8109	425.431
	121	31.0838	381.307
	122	34.2831	445.67
	123	36.5655	394.808
	124	35.6572	522.696
	125	33.4421	385.342
	126	33.125	382.765
	127	37.7531	448.654
	128	35.4696	464.454
	129	34.6709	400.307
	130	33.1612	403.075
	131	36.5161	444.295
	132	35.3429	484.298
	133	37.6078	528.828
	134	34.0566	558.643
	135	37.8398	398.015
	136	37.5931	491.507
	137	38.5462	596.33
	138	32.5412	409.155
	139	32.7086	487.061
	140	38.3104	475.321
	141	35.7327	655.484
	142	33.8196	440.958
	143	33.8877	403.398
	144	37.9571	483.9
	145	31.7443	502.583
	146	36.6701	540.336
	147	35.1958	565.182
	148	37.6335	735.162
	149	31.5905	374.469
	150	32.1042	398.019
	151	37.3072	426.801
	152	36.9913	629.49
	153	33.6962	382.323
	154	36.7981	438.891
	155	36.8646	458.211
	156	35.5183	445.232
	157	33.8388	415.301
	158	37.6716	433.198
	159	37.687	534.387
	160	34.9573	421.619
	161	35.9253	448.43
	162	34.4659	433.5
	163	36.7388	430.354
	164	36.0399	491.206
	165	34.1979	417.033
	166	37.992	529.712
	167	33.9817	440.859
	168	33.8237	391.116
	169	36.118	424.879
	170	37.2604	403.769
	171	38.1813	498.947
	172	32.7176	386.397
	173	37.5365	442.886
	174	37.3399	451.356
	175	33.6425	508.209
	176	34.8248	514.604
	177	35.7423	481.659
	178	34.1703	586.031
	179	38.1016	517.11
	180	38.8917	616.372
	181	35.8976	454.813
	182	35.9135	567.402
	183	35.8869	411.302
	184	38.9447	598.679
	185	33.6821	454.57
	186	38.3632	490.593
	187	37.1522	484.333
	188	30.3388	389.197
	189	35.3925	467.048
	190	35.8947	449.539
	191	38.5458	507.221
	192	39.0948	489.931
	193	36.7964	490.389
	194	34.4667	395.314
	195	36.9493	616.71
	196	39.1126	440.922
	197	35.0765	563.561
	198	34.8003	411.197
	199	35.5506	446.47
	200	35.3498	476.678
	201	30.2805	396.134
	202	35.6251	417.117
	203	33.923	382.747
	204	36.5535	486.237
	205	36.1788	427.471
	206	36.8266	413.524
	207	38.4425	587.415
	208	32.8721	452.467
	209	37.6106	466.436
	210	36.5044	449.497
	211	32.1389	395.933
	212	36.4189	421.948
	213	36.2429	432.021
	214	38.0163	596.512
	215	32.0374	531.637
	216	35.8277	416.567
	217	34.1612	458.559
	218	34.8189	522.693
	219	36.4167	463.759
	220	30.2218	395.282
	221	35.9418	478.516
	222	38.692	534.145
	223	32.9983	387.4
	224	35.6154	383.896
	225	36.3822	532.299
	226	36.3546	408.91
	227	33.5508	505.32
	228	31.351	390.812
	229	35.6347	418.825
	230	36.3965	447.586
	231	38.426	625.154
	232	36.0292	550.455
	233	34.2339	404.797
	234	37.9115	697.274
	235	35.7937	395.649
	236	32.4329	543.512
	237	35.7571	412.813
	238	38.5642	435.769
	239	36.8575	601.691
	240	31.3585	455.309
	241	37.2611	422.075
	242	36.0494	445.798
	243	31.8354	390.667
	244	36.0808	413.852
	245	35.3894	446.29
	246	37.595	582.134
	247	35.7902	390.301
	248	36.744	429.42
	249	37.4427	587.063
	250	35.2718	392.219
	251	34.3275	446.27
	252	36.9573	433.188
	253	38.4804	703.276
	254	35.5254	556.941
	255	31.3556	400.52
	256	36.6419	426.29
	257	35.6751	672.541
	258	35.5268	512.702
	259	33.922	524.004
	260	37.6118	719.057
	261	35.5837	810.061
	262	34.8895	391.365
	263	35.6623	411.717
	264	35.5995	602.391
	265	37.7043	421.914
	266	34.3292	433.793
	267	32.3767	386.456
	268	36.3115	507.874
	269	38.6221	470.401
	270	37.2752	684.639
	271	37.4035	411.537
	272	34.7245	415.367
	273	38.7477	456.384
	274	31.1227	381.36
	275	37.8123	408.68
	276	37.8375	407.055
	277	36.3104	414.196
	278	33.8075	423.873
	279	33.4133	390.08
	280	35.9805	419.547
	281	36.9005	626.926
	282	34.0702	396.43
	283	33.9	562.992
	284	37.5198	432.142
	285	37.3152	438.544
	286	36.2458	474.872
	287	37.1701	454.552
	288	38.0425	471.514
	289	36.2833	482.246
	290	34.6411	401.72
	291	37.8834	612.065
	292	33.8871	424.438
	293	37.2002	516.121
	294	37.5759	698.411
	295	38.6544	499.724
	296	35.8241	453.821
	297	37.0037	435.31
	298	35.5124	473.085
	299	35.6912	431.323
	300	33.4447	445.352
	301	34.0121	437.046
	302	37.7178	406.234
	303	32.34	375.656
	304	34.8998	476.854
	305	35.8704	394.568
	306	38.0795	594.9
	307	37.8406	433.834
	308	36.4959	521.552
	309	36.7683	402.567
	310	37.3018	421.954
	311	37.3681	692.003
	312	36.7273	625.455
	313	36.9381	448.768
	314	35.019	722.486
	315	37.0069	702.405
	316	36.3603	418.376
	317	36.3563	424.754
	318	36.5054	391.006
	319	34.5604	652.42
	320	34.9566	406.005
	321	32.1843	432.974
	322	35.8819	424.087
	323	37.5082	499.693
	324	32.6718	413.682
	325	34.9971	388.519
	326	32.5763	394.26
	327	37.5342	447.865
	328	35.346	660.385
	329	36.1604	396.991
	330	37.8738	549.202
	331	37.3635	436.353
	332	36.7192	736.302
	333	35.4106	491.593
	334	36.5564	405.433
	335	37.5387	409.54
	336	38.1744	424.384
	337	34.9424	381.183
	338	35.1498	712.703
	339	33.4126	382.987
	340	32.5226	394.256
	341	36.9776	425.335
	342	37.2766	516.393
	343	34.193	509.391
	344	34.6673	410.324
	345	36.0775	485.149
	346	38.9054	421.78
	347	37.7095	787.14
	348	33.1399	404.66
	349	36.8338	405.391
	350	35.7727	543.915
	351	36.4839	507.278
	352	35.2312	407.358
	353	37.124	454.897
	354	33.5261	406.486
	355	35.9152	440.863
	356	36.327	521.896
	357	36.7917	699.128
	358	32.5214	396.047
	359	37.3516	487.447
	360	36.0833	414.537
	361	33.2087	393.626
	362	39.2356	482.881
	363	34.8803	417.869
	364	35.0603	405.393
	365	37.4916	685.074
	366	37.9759	670.982
	367	31.9431	428.234
	368	37.1304	481.618
	369	38.7135	469.692
	370	34.0753	442.774
	371	34.1147	438.806
	372	33.9194	688.309
	373	34.779	406.12
	374	34.1666	406.971
	375	35.9689	459.738
	376	34.2113	409.552
	377	36.2979	577.651
	378	38.4617	447.447
	379	33.773	516.598
	380	37.1966	511.723
	381	37.7164	441.907
	382	32.7888	385.468
	383	35.67	587.502
	384	36.5617	611.851
	385	34.9869	680.89
	386	34.1721	531.53
	387	38.312	442.168
	388	38.4921	453.688
	389	34.5002	425.822
	390	29.946	384.28
	391	36.875	406.324
	392	35.4807	575.333
	393	37.7671	430.795
	394	34.5928	498.025
	395	35.3996	413.322
	396	37.9119	416.168
	397	33.9588	435.976
	398	35.2163	439.762
	399	37.1043	424.031
	400	33.2008	389.31
	401	35.2534	416.368
	402	35.2828	418.57
	403	37.9079	458.279
	404	36.9759	580.606
	405	36.5708	535.125
	406	34.6756	407.892
	407	36.4661	446.265
	408	35.3972	405.562
	409	34.417	394.162
	410	36.6026	472.051
	411	34.2458	590.291
	412	33.7148	394.372
	413	37.9858	423.56
	414	36.0091	394.329
	415	37.7129	409.343
	416	39.1218	423.907
	417	33.8151	390.734
	418	37.5439	400.924
	419	37.221	437.665
	420	32.0849	414.256
	421	32.7165	388.192
	422	35.6904	411.41
	423	36.9702	566.916
	424	36.5453	426.01
	425	37.1534	506.423
	426	37.2407	446.659
	427	33.9288	411.963
	428	36.0177	502.99
	429	36.9651	488.99
	430	35.9137	419.936
	431	37.143	453.666
	432	38.0826	451.666
	433	32.7489	429.002
	434	36.5559	431.458
	435	37.1469	521.698
	436	33.0765	395.84
	437	35.3684	434.66
	438	30.1973	414.351
	439	33.2116	388.161
	440	36.0803	465.797
	441	35.7454	411.769
	442	32.8812	430.46
	443	32.4134	435.414
	444	33.8612	395.172
	445	35.4069	400.904
	446	35.1159	462.899
	447	33.1847	551.45
	448	35.2623	483.981
	449	34.4145	393.307
	450	33.0212	475.765
	451	37.8217	445.591
	452	36.745	450.146
	453	35.1702	542.357
	454	38.5572	462.294
	455	32.0765	419.648
	456	35.0413	606.913
	457	37.2224	464.923
	458	37.397	414.594
	459	34.8566	434.082
	460	35.2966	428.691
	461	36.5124	424.304
	462	34.2383	402.809
	463	38.9757	445.816
	464	36.9841	577.676
	465	35.826	417.279
	466	35.9892	411.671
	467	36.2521	466.816
	468	35.0242	425.751
	469	37.665	694.132
	470	37.4903	424.155
	471	33.8956	472.322
	472	36.5624	388.839
	473	35.4792	592.033
	474	38.578	451.58
	475	33.0403	381.691
	476	34.565	505.254
	477	35.8554	495.685
	478	36.3353	440.541
	479	33.5795	403.058
	480	36.1857	414.141
	481	38.0326	499.126
	482	35.2133	461.718
	483	35.5019	584.3
	484	36.1818	395.76
	485	35.8225	391.717
	486	33.5116	433.424
	487	35.6328	397.818
	488	37.6894	562.407
	489	37.2312	426.873
	490	34.9006	462.565
	491	38.0103	532.156
	492	35.7695	412.824
	493	36.8393	416.2
	494	35.0797	550.101
	495	37.106	506.136
	496	36.2853	757.936
	497	32.6142	402.74
	498	34.5544	405.576
	499	36.0526	424.78
	500	34.7064	434.083
	501	31.0649	381.076
	502	34.1345	447.057
	503	36.5954	395.951
	504	35.5816	529.477
	505	33.4861	383.697
	506	33.0753	385.632
	507	34.6393	572.551
	508	35.2513	582.998
	509	37.3887	492.53
	510	37.7269	512.199
	511	36.4366	469.317
	512	36.3068	477.349
	513	37.5133	560.176
	514	34.7815	546.711
	515	38.0083	402.277
	516	38.4263	519.126
	517	38.4911	653.521
	518	33.574	404.579
	519	32.9781	478.356
	520	38.2344	519.922
	521	34.0835	454.491
	522	33.7554	442.135
	523	34.8272	406.677
	524	38.5418	450.52
	525	31.5995	505.452
	526	36.6189	580.038
	527	36.0816	566.098
	528	31.5076	376.654
	529	33.2015	400.318
	530	37.2249	443.437
	531	29.4105	377.475
	532	37.0779	395.549
	533	35.385	508.831
	534	37.4769	441.627
	535	35.4491	454.244
	536	34.8352	409.592
	537	38.1665	419.242
	538	38.5229	559.202
	539	34.8842	434.495
	540	36.627	432.5
	541	35.0177	429.224
	542	36.9122	430.573
	543	35.9361	500.596
	544	34.4903	414.059
	545	37.9439	578.697
	546	33.9555	442.387
	547	34.7564	391.751
	548	36.0219	433.464
	549	38.0125	398.449
	550	38.9211	527.561
	551	33.8435	386.231
	552	37.5052	463.352
	553	37.2441	478.768
	554	33.4917	520.005
	555	32.848	440.42
	556	33.7835	440.047
	557	36.1273	514.017
	558	35.0856	447.822
	559	36.3677	546.677
	560	35.843	486.75
	561	35.7923	588.637
	562	37.9356	428.746
	563	37.8258	483.382
	564	38.2458	584.422
	565	37.8013	456.791
	566	30.7499	450.73
	567	37.7642	435.752
	568	36.7466	553.485
	569	36.4977	525.626
	570	37.5286	531.469
	571	33.909	402.346
	572	35.2389	661.002
	573	37.4623	412.432
	574	35.0799	501.207
	575	37.2411	396.532
	576	36.5531	739.331
	577	37.1576	533.141
	578	37.3654	497.491
	579	36.5596	575.041
	580	35.3655	406.104
	581	36.0753	763.81
	582	33.5886	399.721
	583	33.9537	644.001
	584	33.6542	451.766
	585	37.2366	437.296
	586	37.2712	409.186
	587	31.4733	376.978
	588	34.3926	488.414
	589	35.3806	528.907
	590	34.0236	408.869
	591	32.7068	475.578
	592	36.1231	538.569
	593	36.2064	405.915
	594	38.9825	459.921
	595	33.0869	426.039
	596	36.4829	657.663
	597	36.3242	432.786
	598	33.5353	436.1
	599	36.1405	433.377
	600	37.3037	453.44
	601	32.4132	463.308
	602	37.1196	441.605
	603	37.4923	443.284
	604	36.0986	411.27
	605	35.5889	396.252
	606	37.4074	651.941
	607	37.5585	435.941
	608	37.6404	417.36
	609	32.3178	409.764
	610	36.6198	434.261
	611	36.5872	792.005
	612	38.1462	441.19
	613	36.8409	802.594
	614	34.1816	397.349
	615	36.5708	400.975
	616	37.2803	463.471
	617	35.3848	384.514
	618	36.0482	552.032
	619	36.9102	537.701
	620	35.0329	466.697
	621	35.3923	415.126
	622	37.4952	430.777
	623	36.927	464.294
	624	35.544	434.656
	625	37.5433	563.665
	626	33.985	486.289
	627	35.1712	409.718
	628	37.0298	441.414
	629	38.085	411.902
	630	35.8307	410.784
	631	34.8488	393.098
	632	37.2266	465.951
	633	37.9805	458.617
	634	34.3336	590.35
	635	34.5424	615.676
	636	36.7616	498.915
	637	33.5263	423.949
	638	31.9501	441.705
	639	35.5462	480.492
	640	37.7795	642.091
	641	36.2633	435.364
	642	34.9683	459.599
	643	35.2725	622.165
	644	36.6106	455.718
	645	35.1157	485.132
	646	34.4651	426.628
	647	36.6127	695.143
	648	34.8082	521.988
	649	35.4803	429.422
	650	36.3933	437.041
	651	30.696	381.669
	652	37.1698	446.988
	653	36.1273	417.43
	654	32.8596	392.391
	655	34.2792	423.155
	656	37.2929	468.163
	657	38.5589	444.881
	658	34.9864	411.833
	659	36.6821	560.406
	660	36.1921	408.584
	661	37.6145	761.983
	662	33.3488	399.898
	663	33.2495	395.124
	664	35.1412	530.418
	665	37.6499	576.519
	666	35.4338	403.335
	667	33.7197	428.95
	668	36.2749	431.931
	669	38.0725	489.337
	670	33.1102	412.465
	671	36.2797	505.417
	672	34.1777	410.933
	673	34.8681	556.749
	674	35.2903	495.441
	675	33.6632	417.227
	676	35.6107	640.131
	677	37.8306	460.241
	678	30.8706	386.083
	679	36.4994	542.759
	680	37.7077	438.486
	681	37.8126	445.087
	682	33.0644	405.483
	683	32.2566	391.049
	684	35.0239	396.18
	685	34.6257	422.372
	686	31.5849	384.516
	687	36.677	443.65
	688	36.2499	552.768
	689	37.7695	406.827
	690	33.8588	391.109
	691	36.1846	498.111
	692	38.1895	426.175
	693	36.0525	680.211
	694	35.9267	399.903
	695	38.0365	415.222
	696	34.8093	399.813
	697	38.5315	464.166
	698	36.602	431.271
	699	37.0141	563.037
	700	38.6493	530.248
	701	33.6486	502.486
	702	37.2587	466.893
	703	33.2871	394.526
	704	37.8071	420.051
	705	34.7074	411.144
	706	34.9679	543.841
	707	35.7081	417.987
	708	35.782	449.635
	709	35.2142	407.521
	710	35.3913	487.966
	711	36.012	428.372
	712	36.2029	428.345
	713	37.2168	426.052
	714	36.8988	561.88
	715	35.6514	552.308
	716	37.7213	496.239
	717	38.1058	744.442
	718	28.9056	377.95
	719	34.7531	426.835
	720	36.4804	420.475
	721	35.7175	430.247
	722	31.5162	381.016
	723	38.3515	440.455
	724	36.1615	614.278
	725	36.1577	536.712
	726	33.8341	388.933
	727	35.2465	543.774
	728	38.2016	458.185
	729	37.0643	457.979
	730	34.9218	412.248
	731	37.2982	424.053
	732	33.1214	385.985
	733	32.8715	407.264
	734	36.6175	441.884
	735	36.2149	537.316
	736	35.3121	504.357
	737	36.6123	394.784
	738	35.1565	429.137
	739	38.7704	481.019
	740	37.0959	410.961
	741	31.4563	386.175
	742	35.9136	442.079
	743	33.7736	393.346
	744	32.5167	564.172
	745	37.1989	458.064
	746	35.9686	503.564
	747	33.328	408.085
	748	36.1644	448.684
	749	35.947	531.03
	750	38.6506	413.765
	751	33.4289	395.717
	752	35.9553	424.398
	753	36.837	644.649
	754	35.9503	524.073
	755	34.8116	414.357
	756	35.9538	476.745
	757	38.3626	451.677
	758	35.8977	397.798
	759	35.9185	430.391
	760	33.6387	408.193
	761	38.5725	449.588
	762	37.431	436.691
	763	35.415	419.661
	764	35.3324	418.118
	765	35.5848	499.515
	766	34.4585	442.245
	767	35.1423	394.546
	768	36.9112	430.196
	769	37.9395	411.47
	770	37.1742	452.245
	771	34.1735	392.151
	772	38.1012	458.884
	773	37.9139	475.473
	774	33.9157	542.759
	775	35.2369	534.466
	776	35.5421	460.153
	777	35.4497	442.624
	778	33.8317	455.3
	779	36.0805	541.641
	780	35.3787	617.219
	781	33.7647	399.574
	782	35.6036	400.053
	783	36.495	481.269
	784	36.6488	679.051
	785	34.9749	403.841
	786	36.1024	537.536
	787	36.5442	438.162
	788	36.4634	803.232
	789	37.5348	723.947
	790	35.4995	412.525
	791	36.2545	422.12
	792	37.4019	434.901
	793	36.4473	431.318
	794	31.8917	385.409
	795	35.6839	408.905
	796	38.5873	479.225
	797	34.0765	410.309
	798	35.3105	436.791
	799	35.6897	396.024
	800	37.0867	427.806
	801	34.223	469.177
	802	34.1594	381.901
	803	34.5085	472.02
	804	37.4405	411.297
	805	37.2022	413.1
	806	33.2731	428.789
	807	34.5885	436.964
	808	38.6043	420.365
	809	37.2345	458.948
	810	33.5018	404.823
	811	37.2513	433.615
	812	37.2032	442.564
	813	35.5618	416.732
	814	32.2896	516.241
	815	36.8212	433.266
	816	38.4201	478.553
	817	35.2368	554.324
	818	34.0953	405.186
	819	35.9966	430.395
	820	36.1787	457.966
	821	36.925	446.192
	822	34.3101	398.174
	823	35.8622	394.863
	824	37.3908	469.951
	825	38.1867	597.808
	826	35.942	477.821
	827	37.1575	626.993
	828	32.9148	454.088
	829	36.4001	402.304
	830	33.931	412.11
	831	37.2047	532.168
	832	36.2097	410.464
	833	36.89	415.442
	834	37.768	633.402
	835	38.1588	459.711
	836	37.7193	419.026
	837	36.5403	539.366
	838	36.943	428.756
	839	37.6541	433.876
	840	38.3966	447.843
	841	35.9934	393.752
	842	34.6054	755.786
	843	37.4837	421.412
	844	39.2639	495.589
	845	36.0231	426.135
	846	36.2534	553.98
	847	37.3752	409.969
	848	38.2068	440.256
	849	35.3908	494.689
	850	37.9179	431.116
	851	37.4104	443.293
	852	36.5343	571.385
	853	36.4506	409.449
	854	31.9807	396.982
	855	36.8058	438.858
	856	36.4545	646.366
	857	35.5262	536.593
	858	34.3887	471.515
	859	35.5274	640.493
	860	36.3247	776.503
	861	35.328	389.238
	862	36.1447	411.779
	863	36.7925	498.183
	864	37.8511	438.636
	865	34.8675	440.432
	866	36.2883	543.105
	867	36.8407	521.714
	868	36.6102	416.394
	869	35.1094	486.441
	870	35.1443	429.26
	871	38.6861	472.729
	872	37.9774	419.898
	873	33.911	402.774
	874	32.5053	381.66
	875	36.8568	399.422
	876	32.7498	403.589
	877	36.6843	545.309
	878	36.5966	546.198
	879	36.1039	398.998
	880	34.8144	412.189
	881	36.2106	390.432
	882	38.3635	453.418
	883	37.6647	423.594
	884	35.9289	445.124
	885	36.2672	427.138
	886	37.6844	718.304
	887	32.3902	483.266
	888	36.99	515.972
	889	35.7357	479.955
	890	34.8087	479.477
	891	35.7318	446.049
	892	35.4084	454.579
	893	37.2209	738.03
	894	36.4595	413.514
	895	36.3599	526.293
	896	33.9703	487.581
	897	35.9287	417.967
	898	36.1667	474.303
	899	36.2986	426.914
	900	33.666	447.956
	901	33.636	437.415
	902	38.0699	405.649
	903	32.7194	376.577
	904	35.5539	475.872
	905	36.3754	501.647
	906	37.6812	637.841
	907	34.046	456.207
	908	37.0735	528.722
	909	37.1494	403.937
	910	37.7896	448.515
	911	35.0033	636.641
	912	34.4492	576.507
	913	36.4683	531.323
	914	35.7282	687.105
	915	36.6888	494.527
	916	31.594	384.05
	917	35.5185	576.624
	918	37.2435	440.642
	919	33.0158	394.66
	920	37.0967	405.874
	921	37.6755	431.785
	922	35.3093	388
	923	35.062	407.162
	924	37.823	419.402
	925	36.7998	488.198
	926	33.3853	446.318
	927	34.1927	397.366
	928	36.7018	432.803
	929	36.5408	772.77
	930	30.8551	398.93
	931	37.4173	403.026
	932	37.5444	474.094
	933	34.9615	435.405
	934	37.0273	547.486
	935	36.8573	550.201
	936	36.0878	452.35
	937	37.0872	521.529
	938	34.5606	415.621
	939	34.3371	469.69
	940	37.2509	475.916
	941	32.5169	490.43
	942	37.1181	427.776
	943	35.1385	499.111
	944	36.4079	397.828
	945	37.7846	476.429
	946	39.0354	496.695
	947	34.7004	447.203
	948	37.2564	433.923
	949	37.6526	415.464
	950	37.5276	523.12
	951	34.1607	426.419
	952	38.3679	500.666
	953	37.113	426.909
	954	33.9073	404.174
	955	37.1689	414.774
	956	36.9433	521.696
	957	37.3037	698.273
	958	32.7865	396.592
	959	35.0839	433.173
	960	35.9867	751.761
	961	33.4564	411.811
	962	32.9104	385.846
	963	33.5943	452.57
	964	37.1384	455.575
	965	37.2056	415.775
	966	37.9893	467.304
	967	36.397	572.495
	968	34.0207	467.635
	969	36.4691	488.787
	970	38.0784	591.134
	971	36.3015	649.152
	972	38.294	427.562
	973	33.2592	402.527
	974	35.2303	479.381
	975	35.466	430.786
	976	36.6559	459.567
	977	35.9488	490.316
	978	37.5428	474.968
	979	37.1624	483.87
	980	33.2359	463.162
	981	33.7751	416.233
	982	38.0279	460.372
	983	36.0235	413.253
	984	35.5266	412.444
	985	37.2535	616.956
	986	37.4744	466.599
	987	37.5477	425.772
	988	32.2282	409.453
	989	36.5754	440.462
	990	37.5961	719.758
	991	37.3092	417.453
	992	36.1938	558.362
	993	33.5858	616.647
	994	36.3706	480.819
	995	35.66	433.017
	996	31.3555	547.135
	997	35.0925	443.214
	998	36.117	443.273
	999	37.3741	475.44
	1000	33.5326	392.154
	1001	36.0913	403.942
	1002	36.01	424.583
	1003	35.4557	435.172
	1004	38.4528	586.534
	1005	35.1704	476.335
	1006	38.392	433.978
	1007	36.9595	446.517
	1008	38.0066	417.908
	1009	35.8076	423.832
	1010	34.7064	396.95
	1011	38.1197	470.886
	1012	37.9384	479.607
	1013	33.1339	382.458
	1014	35.7351	589.238
	1015	33.6647	446.971
	1016	36.0234	470.049
	1017	37.3874	524.987
	1018	35.9237	591.704
	1019	35.4618	475.634
	1020	34.4343	401.31
	1021	38.4275	467.249
	1022	37.9617	611.245
	1023	33.8679	526.655
	1024	34.8673	454.594
	1025	35.9319	584.567
	1026	36.488	466.21
	1027	34.4413	379.246
	1028	35.1327	519.896
	1029	35.3432	431.969
	1030	36.2919	438.452
	1031	30.5432	384.835
	1032	34.1131	393.848
	1033	36.1216	442.31
	1034	32.7895	402.91
	1035	34.5881	421.252
	1036	38.1789	481.442
	1037	38.5312	482.01
	1038	35.0002	435.872
	1039	33.4407	395.152
	1040	33.554	443.548
	1041	38.795	443.536
	1042	34.203	440.653
	1043	34.0023	442.511
	1044	37.6349	462.487
	1045	37.1178	850.025
	1046	32.5982	445.092
	1047	33.5737	543.364
	1048	35.9667	480.854
	1049	34.6885	400.212
	1050	34.0185	466.498
	1051	33.1049	389.529
	1052	37.9256	410.235
	1053	36.0658	531.737
	1054	35.5553	490.321
	1055	33.5484	420.948
	1056	36.6291	587.899
	1057	37.7609	476.272
	1058	36.5733	521.623
	1059	37.6516	462.096
	1060	38.3912	454.299
	1061	28.7488	383.506
	1062	35.4132	415.475
	1063	37.4644	414.698
	1064	36.8231	453.501
	1065	37.9998	483.095
	1066	37.8294	486.968
	1067	37.478	583.65
	1068	29.0965	387.705
	1069	36.879	408.801
	1070	34.7566	689.351
	1071	37.1752	450.446
	1072	34.774	556.537
	1073	34.7196	424.558
	1074	37.9585	425.117
	1075	34.7313	400.801
	1076	38.4629	510.835
	1077	36.5042	444.638
	1078	37.9163	515.948
	1079	36.0051	467.622
	1080	30.706	459.021
	1081	37.9073	486.492
	1082	33.1193	396.701
	1083	37.7393	435.011
	1084	34.5665	410.726
	1085	35.687	564.489
	1086	35.3984	434.099
	1087	35.7026	451.626
	1088	35.1524	432.525
	1089	35.7063	472.644
	1090	35.9288	429.91
	1091	36.1683	443.309
	1092	37.2033	445.522
	1093	34.1169	506.64
	1094	35.812	542.426
	1095	37.6705	520.737
	1096	37.9233	709.517
	1097	30.7289	403.273
	1098	36.4121	423.298
	1099	35.6358	445.371
	1100	31.3595	384.98
	1101	38.3124	464.161
	1102	36.0228	609.765
	1103	36.2111	526.021
	1104	33.7424	399.823
	1105	35.4412	544.406
	1106	38.1501	483.624
	1107	37.0221	470.813
	1108	35.8049	442.641
	1109	34.5277	406.955
	1110	33.0673	385.594
	1111	32.9771	404.858
	1112	36.6023	470.99
	1113	37.2459	506.958
	1114	36.2718	469.757
	1115	36.6139	401.821
	1116	35.048	429.676
	1117	36.3245	403.387
	1118	37.048	433.245
	1119	31.3276	386.742
	1120	36.724	439.656
	1121	33.6799	400.867
	1122	35.2858	522.002
	1123	33.71	546.732
	1124	37.1371	471.648
	1125	35.8486	505.809
	1126	33.2457	409.18
	1127	36.103	451.635
	1128	36.4066	510.851
	1129	38.5757	430.421
	1130	33.3622	412.769
	1131	36.5609	422.048
	1132	33.8366	575.569
	1133	36.1823	510.298
	1134	34.6558	415.001
	1135	36.2636	463.521
	1136	36.1506	398.377
	1137	35.8007	398.51
	1138	36.484	509.672
	1139	36.2619	441.521
	1140	33.6039	409.106
	1141	38.5044	479.182
	1142	37.9698	443.052
	1143	35.4474	443.521
	1144	35.7522	417.122
	1145	35.7871	500.421
	1146	34.9715	439.907
	1147	35.0755	403.153
	1148	36.8032	445.362
	1149	38.2273	420.341
	1150	37.0862	453.263
	1151	34.0439	403.344
	1152	38.0571	491.832
	1153	34.9156	438.17
	1154	33.8341	590.206
	1155	35.1356	570.862
	1156	38.0672	571.09
	1157	35.8975	440.202
	1158	34.3016	456.07
	1159	37.1768	515.202
	1160	35.3087	615.796
	1161	33.6119	411.366
	1162	35.9159	396.66
	1163	36.539	479.71
	1164	36.562	701.311
	1165	34.8979	404.841
	1166	37.0482	557.194
	1167	36.4363	442.298
	1168	37.6764	815.475
	1169	34.4915	499.986
	1170	35.472	421.086
	1171	36.697	422.14
	1172	37.3032	461.151
	1173	36.3216	431.411
	1174	31.7757	385.957
	1175	36.3287	405.286
	1176	36.1191	419.374
	1177	33.9469	421.774
	1178	35.2017	436.682
	1179	35.5557	397.847
	1180	37.0166	432.135
	1181	36.4352	451.296
	1182	34.0224	385.425
	1183	35.0181	474.855
	1184	37.3961	415.558
	1185	37.472	414.089
	1186	33.1024	429.79
	1187	34.498	436.723
	1188	38.5877	432.818
	1189	37.1915	481.652
	1190	33.457	421.978
	1191	37.1733	457.091
	1192	37.1001	462.386
	1193	36.252	415.712
	1194	32.1783	526.311
	1195	36.8926	453.032
	1196	38.3519	518.786
	1197	35.1804	599.937
	1198	34.2668	402.403
	1199	35.9649	464.212
	1200	37.0865	452.277
	1201	36.8316	449.973
	1202	34.2792	417.619
	1203	35.7577	408.957
	1204	37.3291	478.982
	1205	34.0547	500.996
	1206	36.2411	471.273
	1207	37.0668	662.686
	1208	33.8198	454.156
	1209	36.3766	419.437
	1210	33.9194	411.798
	1211	37.1104	517.302
	1212	36.1094	414.501
	1213	36.8352	423.254
	1214	37.6795	595.607
	1215	32.2218	400.711
	1216	37.6917	430.387
	1217	36.795	514.225
	1218	36.869	437.963
	1219	37.5928	439.625
	1220	38.794	464.795
	1221	36.1834	392.721
	1222	36.03	733.87
	1223	37.4032	429.827
	1224	39.2106	551.215
	1225	35.9939	439.287
	1226	33.29	491.387
	1227	37.2698	419.833
	1228	38.138	443.963
	1229	36.1327	388.499
	1230	37.861	445.107
	1231	37.3742	474.978
	1232	36.4602	581.404
	1233	36.3531	415.769
	1234	31.8532	397.191
	1235	33.5213	402.964
	1236	36.3555	673.937
	1237	35.9658	573.493
	1238	34.6931	474.513
	1239	35.4117	648.433
	1240	36.2458	817.079
	1241	35.3095	391.93
	1242	36.0577	421.969
	1243	36.761	498.71
	1244	37.8653	458.252
	1245	35.4797	430.264
	1246	37.2946	551.797
	1247	37.1457	499.734
	1248	36.5331	416.733
	1249	35.392	483.853
	1250	35.364	431.37
	1251	38.6435	513.259
	1252	35.1291	397.846
	1253	36.9985	428.896
	1254	32.3883	390.414
	1255	36.775	412.234
	1256	32.6666	404.141
	1257	33.8295	479.723
	1258	36.577	543.084
	1259	35.841	409.709
	1260	34.7169	416.681
	1261	36.1001	394.993
	1262	38.3039	481.704
	1263	37.9397	428.617
	1264	36.493	434.829
	1265	36.5299	436.128
	1266	37.5971	780.565
	1267	32.2964	497.06
	1268	37.8204	475.832
	1269	36.782	464.165
	1270	35.3075	479.346
	1271	36.0558	438.158
	1272	35.5285	455.781
	1273	38.3239	470.11
	1274	36.4123	415.897
	1275	37.4409	508.499
	1276	32.6707	430.31
	1277	34.0812	399.817
	1278	36.3523	466.864
	1279	36.1925	428.665
	1280	34.844	439.577
	1281	34.5338	435.373
	1282	38.0486	413.765
	1283	32.7355	375.453
	1284	35.8446	468.25
	1285	36.298	501.264
	1286	35.9801	531.531
	1287	34.5524	456.535
	1288	37.0037	578.006
	1289	37.0871	415.557
	1290	37.7078	479.452
	1291	35.0926	636.259
	1292	34.3453	580.41
	1293	34.0614	438.3
	1294	35.656	710.367
	1295	37.7499	483.462
	1296	31.4625	385.571
	1297	35.4214	593.994
	1298	37.1923	445.753
	1299	32.903	394.78
	1300	33.7786	393.582
	1301	38.37	435.817
	1302	35.3157	397.34
	1303	35.0476	415.921
	1304	37.7539	430.6
	1305	37.8596	474.654
	1306	34.6333	435.192
	1307	34.1561	407.643
	1308	36.683	450.02
	1309	36.4314	822.709
	1310	30.7766	394.29
	1311	37.4218	423.929
	1312	35.2259	439.411
	1313	34.847	435.303
	1314	33.6352	501.117
	1315	37.8104	509.635
	1316	35.9679	453.897
	1317	37.0585	514.579
	1318	35.3983	411.516
	1319	34.9503	465.236
	1320	37.2933	470.274
	1321	32.4116	493.033
	1322	37.9232	424.074
	1323	35.8541	555.801
	1324	36.9651	434.016
	1325	38.3573	562.49
	1326	31.2542	377.386
	1327	35.9192	503.506
	1328	35.762	405.222
	1329	35.5618	400.98
	1330	38.1852	618.551
	1331	35.4578	443.971
	1332	37.4046	409.19
	1333	37.8839	439.802
	1334	35.6814	393.949
	1335	35.4319	413.455
	1336	38.0187	426.351
	1337	34.6687	570.255
	1338	36.5301	713.976
	1339	34.6478	403.475
	1340	35.891	450.17
	1341	36.7675	815.862
	1342	31.3489	400.578
	1343	37.7128	413.595
	1344	37.2377	490.562
	1345	37.5769	432.341
	1346	38.1901	437.426
	1347	36.5794	397.071
	1348	37.154	623.252
	1349	34.8537	465.864
	1350	36.9347	451.094
	1351	36.1456	582.003
	1352	38.1965	736.269
	1353	33.997	388.341
	1354	35.023	422.325
	1355	35.9941	493.902
	1356	37.5056	401.962
	1357	34.9808	406.288
	1358	36.7166	554.566
	1359	35.4076	461.099
	1360	35.9235	408.238
	1361	34.433	486.343
	1362	34.5811	423.624
	1363	36.3737	424.767
	1364	37.1856	425.438
	1365	33.6392	388.808
	1366	35.2234	651.588
	1367	35.8944	412.297
	1368	38.4015	452.517
	1369	33.0564	423.306
	1370	37.2737	515.72
	1371	34.5241	561.531
	1372	38.5674	437.419
	1373	36.9658	624.496
	1374	35.238	600.632
	1375	37.081	551.931
	1376	36.7734	418.044
	1377	35.2794	521.27
	1378	32.4762	440.107
	1379	36.836	534.017
	1380	35.69	426.273
	1381	35.2633	407.22
	1382	37.3374	436.809
	1383	37.2681	454.442
	1384	36.5301	442.731
	1385	35.9419	492.727
	1386	36.8619	408.273
	1387	37.6485	514.55
	1388	38.7126	439.298
	1389	33.3795	408.236
	1390	36.2889	412.57
	1391	38.6833	602.482
	1392	35.81	466.189
	1393	29.8637	386.211
	1394	36.4909	646.338
	1395	34.7245	497.687
	1396	36.7722	488.681
	1397	35.2031	507.299
	1398	32.6381	456.936
	1399	32.7208	495.056
	1400	35.9689	425.01
	1401	36.7764	415.475
	1402	37.2749	550.874
	1403	34.6504	525.456
	1404	35.8969	427.679
	1405	36.7055	652.55
	1406	37.2376	488.707
	1407	35.1623	388.024
	1408	35.9128	552.712
	1409	37.1862	437.128
	1410	37.2531	446.922
	1411	36.8788	406.729
	1412	35.8149	398.651
	1413	34.4593	397.061
	1414	35.4317	383.921
	1415	30.5861	390.624
	1416	36.1285	437.543
	1417	36.1003	466.362
	1418	37.2647	411.144
	1419	33.0751	395.783
	1420	35.1795	416.038
	1421	34.3918	449.532
	1422	37.3404	416.39
	1423	30.9267	434.672
	1424	35.5484	420.471
	1425	36.3548	397.513
	1426	37.063	407.154
	1427	33.3865	450.48
	1428	33.6909	384.376
	1429	36.7242	553.888
	1430	36.3043	421.986
	1431	35.446	482.256
	1432	34.9702	393.588
	1433	38.6994	430.273
	1434	38.3667	635.317
	1435	36.2871	561.05
	1436	34.4204	463.053
	1437	36.3622	598.046
	1438	38.3867	614.532
	1439	33.933	378.544
	1440	34.36	543.831
	1441	35.3064	432.366
	1442	36.759	440.187
	1443	34.99	400.356
	1444	36.1728	428.224
	1445	38.2975	425.991
	1446	31.2769	404.26
	1447	36.4686	408.546
	1448	36.6975	459.067
	1449	35.4304	644.537
	1450	36.2816	388.789
	1451	37.8457	418.896
	1452	35.5522	699.557
	1453	35.8289	569.032
	1454	38.6566	500.912
	1455	38.6734	457.64
	1456	36.3415	409.032
	1457	37.3815	411.806
	1458	33.7423	441.248
	1459	35.8417	492.889
	1460	37.7863	480.144
	1461	35.7227	453.657
	1462	34.9344	402.481
	1463	36.6297	416.749
	1464	35.3656	423.308
	1465	33.569	557.533
	1466	38.4738	421.512
	1467	38.8384	642.354
	1468	33.3168	383.976
	1469	33.8499	470.05
	1470	37.3729	455.724
	1471	37.6978	408.193
	1472	35.8432	418.256
	1473	34.8585	508.166
	1474	33.3796	618.132
	1475	35.4923	525.719
	1476	35.9816	792.23
	1477	31.1748	381.78
	1478	36.9291	403.504
	1479	37.4693	437.057
	1480	33.3704	433.435
	1481	33.2717	399.962
	1482	36.4877	436.335
	1483	36.8302	654.677
	1484	37.9079	611.489
	1485	31.6318	388.645
	1486	36.2303	560.5
	1487	36.1456	460.074
	1488	39.1404	633.739
	1489	34.1373	390.338
	1490	36.0537	429.663
	1491	35.2989	408.966
	1492	38.107	422.496
	1493	34.1703	422.898
	1494	36.8705	510.775
	1495	33.6554	456.906
	1496	37.7328	423.784
	1497	35.7826	451.426
	1498	37.855	405.897
	1499	35.3961	397.275
	1500	33.3488	391.922
	1501	37.3613	495.948
	1502	31.7392	386.775
	1503	36.2732	552.701
	1504	36.9214	545.447
	1505	34.9066	481.729
	1506	36.6542	544.359
	1507	34.0847	438.427
	1508	36.8546	494.598
	1509	36.3031	503.729
	1510	39.2481	477.637
	1511	31.2609	386.55
	1512	37.1991	474.263
	1513	35.5776	562.815
	1514	36.8114	450.166
	1515	37.5644	724.737
	1516	33.7421	468.548
	1517	37.3223	402.178
	1518	37.0756	404.694
	1519	31.7169	419.492
	1520	33.4965	423.735
	1521	34.3778	434.069
	1522	36.8525	431.861
	1523	35.7766	433.623
	1524	32.3361	409.933
	1525	36.3223	481.116
	1526	36.5615	531.171
	1527	35.7096	492.584
	1528	31.8152	396.886
	1529	34.8964	429.729
	1530	36.8332	404.553
	1531	37.783	478.327
	1532	32.099	387.985
	1533	36.0208	449.168
	1534	36.4108	441.471
	1535	34.7245	530.712
	1536	33.0038	573.859
	1537	37.4276	476.663
	1538	36.1533	510.322
	1539	36.3337	453.723
	1540	37.3352	618.037
	1541	31.6901	385.771
	1542	37.1849	403.889
	1543	37.2783	526.524
	1544	37.2577	744.106
	1545	36.095	424.757
	1546	34.9889	550.393
	1547	37.1637	504.621
	1548	39.4402	475.116
	1549	32.3813	511.919
	1550	32.3205	419.537
	1551	37.2469	490.616
	1552	38.0737	416.481
	1553	37.3883	438.003
	1554	33.6695	391.022
	1555	36.9384	431.87
	1556	37.3155	425.277
	1557	35.3048	410.368
	1558	35.9617	450.605
	1559	36.9123	408.692
	1560	38.5184	441.185
	1561	35.4253	483.688
	1562	34.3032	403.365
	1563	36.7074	619.816
	1564	38.2714	432.303
	1565	38.4609	435.602
	1566	37.7734	461.728
	1567	37.6837	463.924
	1568	39.1708	468.54
	1569	37.8797	448.776
	1570	36.3279	391.668
	1571	34.7486	426.888
	1572	38.1306	430.013
	1573	36.8659	473.974
	1574	33.784	546.912
	1575	35.3143	406.734
	1576	36.3376	456.423
	1577	31.703	376.812
	1578	34.9664	433.104
	1579	34.4123	399.341
	1580	37.7531	489.81
	1581	30.8218	410.457
	1582	32.4195	381.936
	1583	33.9931	389.95
	1584	38.0137	572.179
	1585	36.1142	612.53
	1586	35.1217	428.438
	1587	37.7293	734.614
	1588	37.1535	502.227
	1589	34.6711	394.946
	1590	34.6663	425.484
	1591	38.7193	638.678
	1592	37.3497	430.045
	1593	37.4786	512.27
	1594	35.6711	573.921
	1595	28.5552	402.046
	1596	38.5708	465.482
	1597	34.3913	513.309
	1598	37.5349	533.341
	1599	38.1934	516.385
	1600	37.4249	428.011
	1601	37.4114	404.738
	1602	38.864	430.031
	1603	38.7085	450.109
	1604	37.7654	441.759
	1605	33.7583	428.209
	1606	37.3967	475.409
	1607	38.3449	452.358
	1608	38.6993	499.027
	1609	37.2512	541.727
	1610	36.3725	410.877
	1611	35.3063	419.172
	1612	37.2058	600.353
	1613	36.9946	492.188
	1614	37.5297	403.682
	1615	35.3136	406.095
	1616	38.2179	692.573
	1617	33.9444	507.478
	1618	36.3417	475.08
	1619	37.4476	631.359
	1620	35.3078	838.044
	1621	35.9225	431.243
	1622	33.1426	416.416
	1623	37.5092	527.578
	1624	36.6505	411.853
	1625	32.6095	430.12
	1626	38.0245	616.286
	1627	34.7864	494.531
	1628	37.5716	424.315
	1629	36.1505	541.045
	1630	36.966	441.403
	1631	36.8591	449.805
	1632	38.6283	442.567
	1633	36.3499	394.549
	1634	30.1604	381.697
	1635	34.1823	396.891
	1636	33.4317	424.29
	1637	36.9669	476.756
	1638	37.3119	594.529
	1639	34.3655	387.216
	1640	35.5862	466.027
	1641	37.3928	411.778
	1642	36.3513	444.557
	1643	33.7929	430.362
	1644	33.8008	421.669
	1645	35.4807	771.126
	1646	33.9307	507.188
	1647	35.7472	442.376
	1648	37.4528	549.862
	1649	37.8361	531.846
	1650	34.2021	436.357
	1651	36.3153	477.494
	1652	37.292	395.355
	1653	37.8927	421.188
	1654	38.0744	576.095
	1655	37.516	529.843
	1656	36.5432	462.925
	1657	35.8977	587.037
	1658	36.4347	446.303
	1659	35.5174	477.286
	1660	35.2854	489.771
	1661	38.8341	442.275
	1662	34.3736	382.142
	1663	33.3056	497.025
	1664	37.0716	540.895
	1665	36.7704	539.354
	1666	35.3124	484.033
	1667	34.9789	522.004
	1668	35.3568	406.678
	1669	38.1355	425.012
	1670	37.1587	617.542
	1671	36.4168	563.236
	1672	34.8903	444.235
	1673	36.5727	745.528
	1674	34.6625	416.022
	1675	37.5352	398.877
	1676	37.3719	607.322
	1677	37.8512	512.907
	1678	33.6416	409.979
	1679	35.3657	414.584
	1680	33.5537	408.706
	1681	33.4549	386.34
	1682	32.0947	408.31
	1683	38.7347	525.619
	1684	34.4575	421.53
	1685	35.3586	494.912
	1686	32.1682	400.239
	1687	36.993	430.978
	1688	35.5448	853.312
	1689	31.709	402.654
	1690	35.9276	389.609
	1691	35.9222	447.257
	1692	37.9485	457.905
	1693	34.9446	503.519
	1694	35.7566	509.742
	1695	36.7511	489.183
	1696	37.7661	603.263
	1697	32.3734	416.636
	1698	32.0576	507.257
	1699	37.9735	552.226
	1700	34.0239	498.943
	1701	38.4761	462.675
	1702	34.9226	435.63
	1703	36.4644	517.494
	1704	37.5909	436.302
	1705	31.2342	378.694
	1706	33.0041	464.199
	1707	35.6244	406.175
	1708	35.4979	402.96
	1709	38.1212	687.639
	1710	35.9738	435.444
	1711	37.3082	414.174
	1712	38.5694	447.196
	1713	35.6224	407.094
	1714	35.422	426.24
	1715	37.9824	441.785
	1716	34.5917	575.184
	1717	36.44	737.699
	1718	34.5621	418.061
	1719	36.8992	436.399
	1720	36.6621	875.301
	1721	31.3637	396.2
	1722	37.6853	441.862
	1723	37.2173	473.677
	1724	37.5058	434.494
	1725	38.1451	465.984
	1726	33.1751	390.596
	1727	32.5788	516.253
	1728	37.2426	572.205
	1729	36.9657	447.783
	1730	36.0565	600.221
	1731	35.3807	749.318
	1732	33.932	397.032
	1733	30.881	407.033
	1734	37.1021	477.597
	1735	37.4029	404.371
	1736	34.8877	409.507
	1737	36.6106	607.315
	1738	36.5267	452.945
	1739	35.7959	412.783
	1740	34.4059	520.742
	1741	35.2588	421.651
	1742	36.2852	427.004
	1743	37.4499	432.526
	1744	33.6646	386.193
	1745	36.349	640.334
	1746	35.7902	415.489
	1747	38.3816	485.58
	1748	33.9504	419.004
	1749	37.2865	490.437
	1750	35.4253	812.472
	1751	37.0972	433.317
	1752	35.7317	872.344
	1753	35.2001	623.663
	1754	37.039	609.625
	1755	37.5295	413.889
	1756	35.1737	540.123
	1757	33.386	442.811
	1758	37.686	490.558
	1759	35.5898	429.187
	1760	35.1639	425.805
	1761	34.2309	396.078
	1762	33.9349	425.282
	1763	37.2135	445.218
	1764	31.8791	434.927
	1765	35.865	515.488
	1766	36.7472	409.007
	1767	37.702	491.06
	1768	39.1482	455.609
	1769	34.1861	410.518
	1770	36.1415	426.056
	1771	36.1562	478.845
	1772	35.8764	468.091
	1773	29.7224	385.842
	1774	36.4386	702.62
	1775	37.362	496.642
	1776	35.2964	441.45
	1777	35.1091	519.385
	1778	33.8263	442.072
	1779	32.6125	499.887
	1780	35.822	445.022
	1781	37.4366	412.968
	1782	37.1869	574.269
	1783	34.5083	537.939
	1784	36.1378	425.716
	1785	37.7455	683.36
	1786	37.2252	480.459
	1787	34.9006	393.86
	1788	35.7974	589.478
	1789	37.0936	451.982
	1790	37.952	451.549
	1791	36.8606	430.528
	1792	35.7279	405.079
	1793	34.3596	398.877
	1794	35.3999	391.211
	1795	30.4896	390.373
	1796	36.0264	458.07
	1797	36.2344	467.533
	1798	37.1587	415.735
	1799	32.9596	397.907
	1800	35.4389	540.571
	1801	35.4934	439.921
	1802	37.2894	417.472
	1803	35.8906	419.544
	1804	36.239	400.749
	1805	37.3839	404.314
	1806	33.2971	462.697
	1807	33.7129	396.677
	1808	37.5658	590.982
	1809	35.986	438.997
	1810	35.3265	510.464
	1811	34.9228	398.577
	1812	38.6854	455.643
	1813	35.5664	568.417
	1814	33.0041	553.083
	1815	38.2052	462.584
	1816	36.2521	613.677
	1817	36.8299	470.713
	1818	33.9281	379.614
	1819	35.171	535.977
	1820	35.7901	433.413
	1821	36.6806	440.321
	1822	31.1423	384.468
	1823	34.0565	407.388
	1824	38.2194	439.759
	1825	32.3617	401.808
	1826	36.8478	407.897
	1827	36.8547	460.834
	1828	35.3442	653.767
	1829	36.2316	396.757
	1830	37.7728	431.54
	1831	36.5865	700.814
	1832	35.8922	440.931
	1833	35.7136	599.21
	1834	38.7869	473.379
	1835	36.078	423.462
	1836	36.2269	412.946
	1837	37.2745	418.596
	1838	34.4147	444.296
	1839	35.7371	504.631
	1840	37.8189	472.817
	1841	35.793	455.233
	1842	36.1175	453.561
	1843	34.8532	416.164
	1844	36.5881	416.639
	1845	35.8015	419.292
	1846	33.4354	562.334
	1847	38.429	430.825
	1848	38.4061	488.305
	1849	33.3404	386.174
	1850	33.7534	474.889
	1851	37.6293	444.704
	1852	37.6774	411.869
	1853	35.7403	418.668
	1854	34.744	523.499
	1855	34.1395	600.895
	1856	35.542	526.333
	1857	33.4177	508.625
	1858	35.8284	396.635
	1859	36.8584	409.033
	1860	37.385	454.384
	1861	34.1934	435.064
	1862	33.1373	411.751
	1863	36.3909	437.927
	1864	37.9169	672.377
	1865	34.7819	565.987
	1866	31.4839	388.522
	1867	36.1304	588.675
	1868	37.2851	452.45
	1869	36.7085	468.54
	1870	34.0045	392.567
	1871	36.5507	406.103
	1872	34.7708	412.254
	1873	38.0464	443.863
	1874	35.0455	423.001
	1875	36.7236	510.772
	1876	33.5327	464.977
	1877	37.6968	442.026
	1878	36.2247	444.454
	1879	37.771	414.37
	1880	35.3029	399.086
	1881	33.2713	394.229
	1882	37.5414	476.685
	1883	31.6287	387.081
	1884	36.1733	596.529
	1885	36.8272	579.677
	1886	36.0811	474.155
	1887	37.6921	515.114
	1888	35.0591	421.444
	1889	36.8599	479.59
	1890	36.1878	514.995
	1891	37.045	409.989
	1892	31.1371	387.665
	1893	37.5438	456.186
	1894	35.4926	580.644
	1895	37.0262	446.485
	1896	37.0967	418.989
	1897	37.2802	407.606
	1898	37.0529	413.056
	1899	31.6577	427.676
	1900	34.2913	425.07
	1901	38.4799	426.63
	1902	37.5801	428.066
	1903	36.152	436.329
	1904	33.4311	410.45
	1905	36.9177	459.463
	1906	36.4645	566.43
	1907	35.5984	536.812
	1908	32.9764	399.405
	1909	35.5107	432.041
	1910	36.7451	404.811
	1911	37.7473	470.116
	1912	31.9346	387.774
	1913	36.1744	447.908
	1914	36.8382	439.126
	1915	35.6726	525.381
	1916	32.8716	579.851
	1917	37.3499	504.341
	1918	36.5414	544.555
	1919	35.6945	493.409
	1920	34.7216	565.578
	1921	37.2477	653.099
	1922	31.671	386.837
	1923	37.1468	412.925
	1924	37.2284	570.642
	1925	37.18	806.496
	1926	36.5936	416.299
	1927	34.8738	556.482
	1928	38.0265	472.031
	1929	37.5202	408.828
	1930	32.7205	499.004
	1931	33.2989	422.737
	1932	37.7214	467.754
	1933	38.659	415.054
	1934	37.3248	446.844
	1935	33.6708	397.83
	1936	37.3277	423.168
	1937	37.2353	433.499
	1938	36.3876	406.313
	1939	37.0136	438.553
	1940	36.9593	415.415
	1941	32.3131	393.073
	1942	33.7894	431.196
	1943	35.4564	410.223
	1944	35.6787	504.593
	1945	38.6069	444.403
	1946	38.4084	462.18
	1947	37.9367	447.156
	1948	38.514	444.181
	1949	39.1326	510.661
	1950	37.8474	448.842
	1951	36.2268	393.556
	1952	35.8507	420.871
	1953	38.0666	431.927
	1954	37.162	454.087
	1955	35.2218	409.339
	1956	36.5777	452.99
	1957	31.6892	378.066
	1958	35.8331	422.878
	1959	38.1071	400.812
	1960	37.8426	476.738
	1961	32.2774	383.146
	1962	33.9781	386.746
	1963	38.8105	525.795
	1964	35.2441	560.682
	1965	33.5106	500.599
	1966	34.8046	728.517
	1967	37.9308	535.077
	1968	34.5324	395.714
	1969	35.4125	421.584
	1970	36.0531	534.129
	1971	39.5382	460.031
	1972	35.4089	421.599
	1973	36.7333	573.892
	1974	29.8299	405.149
	1975	35.8721	425.578
	1976	34.2944	522.49
	1977	35.5996	439.37
	1978	38.2069	490.805
	1979	37.3776	430.08
	1980	37.3553	420.549
	1981	38.8302	462.556
	1982	38.6973	482.483
	1983	38.5247	442.261
	1984	34.5037	431.11
	1985	37.3015	493.516
	1986	35.1379	402.018
	1987	37.1563	593.092
	1988	36.8725	433.435
	1989	36.0469	418.188
	1990	37.1374	638.712
	1991	34.3229	422.137
	1992	37.4736	414.643
	1993	38.2269	413.309
	1994	38.168	758.231
	1995	33.8226	516.311
	1996	36.2471	492.865
	1997	37.3757	659.113
[truncated: 8,003 more rows]
